# Supplementary material for: Prevalence of Feline Coronavirus Shedding in German Catteries and Associated Risk Factors
Source: MDPI journal article supplement (doi:10.3390/v12091000), 2020-09-08
Supplement: s1 [file s1]

# Survey for the investigation of prevalence of feline coronavirus shedding in catteries

Date \_\_\_\_\_

Date and time of defecation: \_\_\_\_\_

## Owner's information

Name \_\_\_\_\_

Phone number \_\_\_\_\_

E-mail address \_\_\_\_\_

Postal code and city \_\_\_\_\_

## Information of cat

Name \_\_\_\_\_

Date of birth or approximate age \_\_\_\_\_

Sex      male    ☐      female      ☐

This cat is    intact    ☐      neutered      ☐

Has this cat been vaccinated against feline infectious peritonitis (FIP?)      yes ☐      no ☐

Faecal score (to be answered by the investigator)    1    2    3    4    5    6    7

## Information on housing and husbandry

1. Food:      commercial diet    ☐      home-cooked diet    ☐  
                 raw diet                    ☐

2. Water source:    tap water            ☐      toilet    ☐      bird bath    ☐  
                 pond/creek/pool ☐      exclusively bottled water ☐  
                 other: \_\_\_\_\_

3. Living conditions:    only inside the house    ☐      free-roaming                    ☐  
                                         mainly inside, but access to balcony ☐      or secured garden area ☐

4. Total number of cats living in the household at this time \_\_\_\_\_

5. Age and number of all cats living in the household:  
    number of kittens <3 months    \_\_\_\_\_      number of juveniles <1 year    \_\_\_\_\_  
    number of adults of 1-5 years    \_\_\_\_\_      number of adults >5 years    \_\_\_\_\_

6. Do all cats live together or are they separated into groups?  
    all together    ☐      separation into groups of    \_\_\_\_\_    cats

7. Are there other pets in your household besides cats?  
    yes ☐      no ☐  
    If yes, what types and numbers of pets? \_\_\_\_\_

# Survey for the investigation of prevalence of feline coronavirus shedding in catteries

8. Total number of litter boxes \_\_\_\_\_
9. With how many cats does **this** cat share its litter boxes? \_\_\_\_\_
10. How often do you clean the litter boxes per day? \_\_\_\_\_
11. How often do you wash and disinfect the litter boxes? \_\_\_\_\_
12. Do you apply any other hygiene measures? yes ☐ no ☐  
If yes, what exactly? \_\_\_\_\_
13. Did your cat ever have contact to cats from other households? yes ☐ no ☐  
If yes, what kind of contact (e.g. while free-roaming, for breeding purposes, at cat shows etc.) \_\_\_\_\_
14. Approximate size of your cat's permanent living space (in m<sup>2</sup>)? \_\_\_\_\_
15. Are other cats of your cattery vaccinated against FIP? yes ☐ no ☐  
If yes, how many? all ☐ all that live together with this cat ☐  
some that live together with this cat ☐
16. Against which infectious agents are your cats vaccinated routinely?  

|                     |                          |               |                          |
|---------------------|--------------------------|---------------|--------------------------|
| Herpes-/Calicivirus | <input type="checkbox"/> | Panleukopenia | <input type="checkbox"/> |
| FeLV                | <input type="checkbox"/> | Rabies        | <input type="checkbox"/> |
|                     |                          | other         | <input type="checkbox"/> |
17. How often do new cats move into your household?  
\_\_\_\_\_

## Medical history

1. Does this cat have any chronic diseases? (e.g. hyperthyroidism, kidney or liver disease, food allergies etc.)?  
\_\_\_\_\_
2. Did this cat have softer stool or diarrhoea within the last 6 months?  
 yes ☐ no ☐  
 If yes,  
 when and how long? \_\_\_\_\_  
 is diarrhoea still present now? ☐ yes ☐ no ☐  
 how often (per day) did this cat have to defecate when having diarrhoea?  
 1x ☐ 2x ☐ 3x ☐ 4x ☐ ≥5x ☐  
 did this cat also lose weight? yes ☐ no ☐  
 did the diarrhoea also contain blood or mucus?  
 yes ☐ (please specify) \_\_\_\_\_ no ☐  
 did you present the cat to a veterinarian for treatment? yes ☐ no ☐  
 was a diagnosis established? yes, \_\_\_\_\_ no ☐  
 was the diarrhoea treated medically? yes ☐ no ☐

# Survey for the investigation of prevalence of feline coronavirus shedding in catteries

If yes,

name of the medication: \_\_\_\_\_

was the treatment successful? yes ☐ no ☐

3. Has this cat been examined for intestinal parasites by faecal exam within the last 6 months? yes ☐ no ☐

If yes, what has been found?

*Giardia spp.* ☐ *Cryptosporidium spp.* ☐ *Strongyloides spp.* ☐

other ☐ \_\_\_\_\_

4. Has this cat been treated (dewormed) for intestinal parasites within the last 6 months? yes ☐ no ☐

If yes,

which preparation? \_\_\_\_\_

dosage and treatment period: \_\_\_\_\_

reason for treatment: prophylactic treatment ☐

other ☐ (please specify) \_\_\_\_\_

5. Did this cat receive antibiotics within the last 6 months?

yes ☐ no ☐

If yes,

which preparation? \_\_\_\_\_

dosage and treatment period: \_\_\_\_\_

reason for treatment: \_\_\_\_\_

6. Has this cat ever been tested positive for feline coronavirus (FCoV)?

yes ☐ no ☐

If yes, what kind of test has been used?

test for FCoV antibodies in the blood ☐

test for viral RNA in the blood ☐ in the faeces ☐

7. Has this cat ever been exposed to special, stressful events? (e.g. relocation, hospitalization, parturition, surgery)

yes \_\_\_\_\_ (please specify)

when? \_\_\_\_\_

no ☐

8. Did this cat receive any kind of immunosuppressive medication within the last 6 months? (e.g. prednisolone/other glucocorticoids, cytostatic agents)

yes \_\_\_\_\_ (please specify)

when and for how long? \_\_\_\_\_

no ☐

9. Did other cats in your household have diarrhoea within the last 6 months?

yes ☐ no ☐

# Survey for the investigation of prevalence of feline coronavirus shedding in catteries

If yes, how many cats? \_\_\_\_\_

10. Have other cats of your household been examined for intestinal parasites within the last 6 months?      yes ☐      no ☐

If yes, what has been found?      *Giardia spp.* ☐      *Cryptosporidium spp.* ☐  
                                         *Strongyloides spp.* ☐      other \_\_\_\_\_

11. Has any cat of your household ever been tested positive for FCoV?

yes ☐      no ☐

If yes,

how many and when? \_\_\_\_\_

what kind of tests have been used?

test for FCoV antibodies in the blood ☐

test for viral RNA in the blood ☐      in the faeces ☐

12. Have any of your cats ever been diagnosed with FIP?      yes ☐      no ☐

If yes,

how many cats? \_\_\_\_\_

when? \_\_\_\_\_

how was FIP diagnosed?

suspected on the basis of clinical presentation ☐

suspected on the basis of laboratory abnormalities (bloodwork) ☐

detection of mutated viral RNA by PCR (using a blood sample) ☐

detection of mutated viral RNA by PCR (using a faecal sample) ☐

detection of FCoV antibodies (using a blood sample) ☐

Titre: \_\_\_\_\_

Rivalta's test (on abdominal effusion) ☐

detection of FCoV antigen in macrophages

in effusion, by immunofluorescence ☐

in tissue samples, by immunohistochemistry ☐

histopathological examination of organ samples obtained

in necropsy ☐
