# Supplementary material for: Prevalence of Feline Coronavirus Shedding in German Catteries and Associated Risk Factors
Source: MDPI journal article supplement (doi:10.3390/v12091000), 2020-09-08
Supplement: s1 [file s1]

# Fragebogen zur Untersuchung der Prävalenz und Korrelation mit Durchfall von feline Coronaviren in Katzensuchten

Datum \_\_\_\_\_

Kotabsatz-Datum und Uhrzeit: \_\_\_\_\_

## Besitzerinformationen

Name \_\_\_\_\_

Telefonnummer \_\_\_\_\_

Emailadresse \_\_\_\_\_

Postleitzahl und Ort \_\_\_\_\_

## Informationen zur Katze

Name der Katze \_\_\_\_\_

Geburtsdatum oder ungefähres Alter der Katze \_\_\_\_\_

Geschlecht männlich ☐ weiblich ☐

Diese Katze ist intakt ☐ kastriert ☐

Ist die Katze gegen FIP geimpft? ja ☐ nein ☐

Faecal score der Katze (vom Untersucher auszufüllen) 1 2 3 4 5 6 7

## Informationen zur Haltung und Pflege der Katze

1. Fütterung: kommerzielles Futter ☐ selbstgekochtes Futter ☐  
Rohfütterung ☐

2. Trinkwasserquelle: Wasserhahn ☐ Toilette ☐ Vogelbad ☐  
Bach / Gartenteich / Pool ☐  
ausschließlich Mineralwasser ☐ Sonstiges: \_\_\_\_\_

3. Meine Katze lebt: nur im Haus ☐ als Freigänger ☐  
vor allem im Haus, aber mit eingeschränktem Freigang auf dem Balkon ☐ bzw. im Garten ☐

4. Gesamtzahl aktuell im Haushalt lebender Katzen \_\_\_\_\_

5. Alter und Anzahl aller im Haushalt lebenden Katzen:

Anzahl Welpen bis 3 Monate \_\_\_\_\_ Anzahl Jungkatzen bis 1 Jahr \_\_\_\_\_

Anzahl adulter Katzen bis 5 Jahre \_\_\_\_\_ Anzahl adulter Katzen >5 Jahre \_\_\_\_\_

6. Werden alle Katzen der Zucht zusammen gehalten, oder gibt es kleinere Gruppen?  
alle zusammen ☐ Gruppenhaltung zu jeweils \_\_\_\_\_ Katzen

7. Gibt es noch andere Haustiere in Ihrem Haushalt außer Katzen?

ja ☐ nein ☐

Falls ja, welche Tierarten und wie viele? \_\_\_\_\_

# Fragebogen zur Untersuchung der Prävalenz und Korrelation mit Durchfall von feline Coronaviren in Katzenzuchten

8. Gesamtzahl der Katzenttoiletten im Haushalt \_\_\_\_\_
9. Mit wie vielen Katzen teilt sich diese Katze die Katzenttoiletten? \_\_\_\_\_
10. Wie oft am Tag werden die Katzenttoiletten gereinigt? \_\_\_\_\_
11. Wie oft werden die Katzenttoiletten gewaschen und desinfiziert? \_\_\_\_\_
12. Werden noch andere Hygienemaßnahmen durchgeführt? ja ☐ nein ☐  
Falls ja, welche genau? \_\_\_\_\_
13. Hatte Ihre Katze schon einmal direkten Kontakt zu anderen Katzen außerhalb Ihrer Zucht? ja ☐ nein ☐  
Falls ja, welche Art von Kontakt (z. B. Freigänger, Zuchtzwecke, Ausstellung,...) \_\_\_\_\_
14. Wie viele Quadratmeter beträgt die Fläche Ihres Haushaltes, zu der Ihre Katzen Zugang haben? \_\_\_\_\_
15. Sind andere Katzen Ihrer Zucht gegen FIP geimpft? ja ☐ nein ☐  
Falls ja, wie viele? alle ☐ alle, zu denen diese Katze Kontakt hat ☐  
nur einzelne, zu denen diese Katze Kontakt hat ☐
16. Wogegen werden die Katzen Ihrer Zucht ansonsten regelmäßig geimpft?  
Katzenschnupfenkomplex ☐ Feline Panleukopenie ☐  
FeLV ☐ Tollwut ☐ sonstige Impfungen ☐
17. Wie häufig nehmen Sie neue Katzen in Ihren Bestand auf? \_\_\_\_\_

## Krankheitsgeschichte

1. Gibt es irgendwelche bekannten chronischen Erkrankungen bei dieser Katze (Schilddrüsenüberfunktion, Nieren- oder Lebererkrankungen, Futtermittelallergien, o.ä.)?  
\_\_\_\_\_
2. Hatte diese Katze innerhalb der letzten 6 Monate weichen Kot oder Durchfall?  
ja ☐ nein ☐  
Falls ja,  
wann und für wie lange? \_\_\_\_\_  
hat die Katze aktuell noch Durchfall? ja ☐ nein ☐  
wie oft am Tag setzt/setzte Ihre Katze Durchfall ab?  
1x ☐ 2x ☐ 3x ☐ 4x ☐  $\geq 5x$  ☐  
war der Durchfall mit Gewichtsverlust verbunden? ja ☐ nein ☐  
war dem Durchfall Schleim oder hellrotes Blut beigemischt?  
ja ☐ \_\_\_\_\_ nein ☐  
wurde die Katze aufgrund dessen einem Tierarzt vorgestellt? ja ☐ nein ☐

## Fragebogen zur Untersuchung der Prävalenz und Korrelation mit Durchfall von feline Coronaviren in Katzenzuchten

wurde eine Diagnose gestellt? ja, \_\_\_\_\_ nein ☐

wurde der Durchfall mit Medikamenten behandelt? ja ☐ nein ☐

Falls ja,

welches Präparat? \_\_\_\_\_

war die Behandlung erfolgreich (Durchfall weg)? ja ☐ nein ☐

3. Wurde diese Katze in den letzten 6 Monaten auf gastrointestinale Parasiten untersucht? ja ☐ nein ☐

Falls ja, wie lautete die Diagnose?

*Giardia spp.* ☐ *Cryptosporidium spp.* ☐ Würmer ☐

Sonstiges ☐ \_\_\_\_\_

4. Wurde diese Katze in den letzten 6 Monaten gegen Parasiten behandelt (z. B. Wurmkuren)? ja ☐ nein ☐

Falls ja,

welches Präparat? \_\_\_\_\_

Dosierung und Dauer der Behandlung: \_\_\_\_\_

aus welchem Grund wurde behandelt?

routinemäßig ☐ andere Gründe ☐ \_\_\_\_\_

5. Hat diese Katze in den letzten 6 Monaten Antibiotika bekommen?

ja ☐ nein ☐

Falls ja,

welche Antibiotika wurden verabreicht? \_\_\_\_\_

wann und für wie lange wurde antibiotisch behandelt? \_\_\_\_\_

und warum wurde es angewendet? \_\_\_\_\_

6. Wurde bei dieser Katze jemals felines Coronavirus (FCoV) nachgewiesen?

ja ☐ nein ☐

Falls ja, mit welchem Verfahren?

FCoV-Antikörpernachweis aus dem Serum ☐

Virus-RNA-Nachweis per PCR aus dem Blut ☐ aus dem Kot ☐

7. Gab es im Leben dieser Katze ein oder mehrere besondere, mit Stress verbundene Ereignisse? (z. B. Umzug, Klinikaufenthalt, Geburt, Operation)

ja \_\_\_\_\_ (Beschreibung)

Falls ja, wann? \_\_\_\_\_

nein ☐

8. Hat diese Katze innerhalb der letzten 6 Monate immunsuppressive Medikamente erhalten? (z. B. Kortison/Glukokortikoide, Zytostatika)

ja, \_\_\_\_\_ (Präparat)

Falls ja, wann und für wie lange? \_\_\_\_\_

nein ☐

## Fragebogen zur Untersuchung der Prävalenz und Korrelation mit Durchfall von feline Coronaviren in Katzenzuchten

9. Hatten andere Katzen in Ihrem Haushalt in den letzten 6 Monaten Durchfall?  
ja ☐ nein ☐  
Falls ja, wie viele Katzen? \_\_\_\_\_
10. Wurden noch andere Katzen in Ihrem Haushalt in den letzten 6 Monaten auf gastro-intestinale Parasiten untersucht? ja ☐ nein ☐  
Falls ja, wie lautete die Diagnose? *Giardia sp.* ☐ *Cryptosporidium spp.* ☐  
Würmer ☐ Sonstiges \_\_\_\_\_
11. Wurde jemals bei einer anderen Katze Ihres Haushalts eine Infektion mit dem feline Coronavirus (FCoV) festgestellt? ja ☐ nein ☐  
Falls ja,  
bei wie vielen und wann? \_\_\_\_\_  
welche Untersuchungen wurden gemacht?  
FCoV-Antikörpernachweis aus dem Serum ☐  
Virus-RNA-Nachweis per PCR aus dem Blut ☐ aus dem Kot ☐
12. Wurde jemals bei einer Katze Ihrer Zucht FIP diagnostiziert? ja ☐ nein ☐  
Falls ja,  
bei wie vielen Katzen? \_\_\_\_\_  
wann war das? \_\_\_\_\_  
wie wurde die Diagnose gestellt?  
Verdacht auf FIP anhand des klinischen Bildes ☐  
Verdacht auf FIP anhand von Veränderungen im Blut / Serum ☐  
mutierte Virus-RNA-Nachweis per PCR aus dem Blut ☐  
mutierte Virus-RNA-Nachweis per PCR aus dem Kot ☐  
Antikörper-Nachweis im Serum („FIP-Test“) ☐  
Titer: \_\_\_\_\_  
Untersuchung von Ergussflüssigkeit (Rivaltaprobe) ☐  
Nachweis von FCoV in Makrophagen im Erguss  
per Immunfluoreszenz ☐  
oder in Gewebeproben per Immunhistochemie ☐  
pathologischer Nachweis von Organveränderungen ☐
